# Supplementary material for: Thickness of the cerebral cortex shows positive association with blood levels of triacylglycerols carrying 18-carbon fatty acids
Source: PubMed Central journal article supplement (PMC7441395; doi:10.1038/s42003-020-01189-5), 2020-08-20
Supplement: 42003_2020_1189_MOESM9_ESM.pdf [file 42003_2020_1189_MOESM9_ESM.pdf]

## Description of Additional Supplementary Files

**Supplementary Data 1.** Triacylglycerol concentrations and associations with mean cortical thickness

**Supplementary Data 2.** Beta estimates of the 7 TAGs on the thickness of 34 cortical regions and their averages (average beta profile)

**Supplementary Data 3.** Functional enrichment of astrocyte-specific genes expression of which is associated with the 'average beta profile'

**Supplementary Data 4.** Functional enrichment of CA1 pyramidal cell-specific genes expression of which is associated with the 'average beta profile'

**Supplementary Data 5.** Functional enrichment of S1 pyramidal cell-specific genes expression of which is associated with the 'average beta profile'

**Supplementary Data 6.** Functional enrichment of ependymal cell-specific genes expression of which is associated with the 'average beta profile'

**Supplementary Data 7.** Functional enrichment of microglia-specific genes expression of which is associated with the 'average beta profile'
